# Supplementary material for: A targeted decision aid for the elderly to decide whether to undergo colorectal cancer screening: development and results of an uncontrolled trial
Source: Springer Nature journal article supplement (doi:10.1186/1472-6947-10-54), 2010-09-17

# For every 1000 women age 80 there are:

150 who will die of heart disease →

60 who will die of a stroke →

10 who will die of colon cancer →

The box to the right represents 1000 women. Each ○ represents 1 woman.

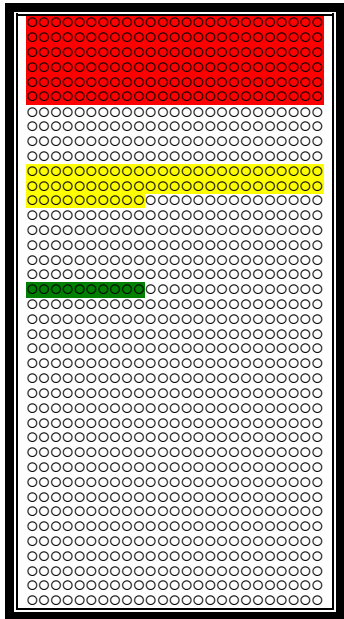

Supplement: 12911_2010_355_MOESM1_ESM.pdf [file 12911_2010_355_MOESM1_ESM.pdf]
