# Supplementary material for: A targeted decision aid for the elderly to decide whether to undergo colorectal cancer screening: development and results of an uncontrolled trial
Source: Springer Nature journal article supplement (doi:10.1186/1472-6947-10-54), 2010-09-17

The incidence of serious complications is less than 5 out of 1000 colonoscopies.

Bleeding that required a transfusion occurred in about 3 per 1000 colonoscopies. →

Perforation or tears in the bowel that required surgery occurred in about 1 per 1000 colonoscopies. →

Death directly from complications occurred in less than 1 per 1000 colonoscopies. →

The box to the right represents 1000 women. Each ○ represents 1 woman.

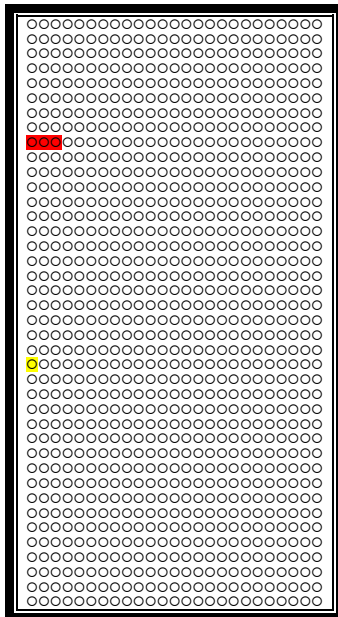

Supplement: 12911_2010_355_MOESM2_ESM.pdf [file 12911_2010_355_MOESM2_ESM.pdf]
