# Supplementary material for: A targeted decision aid for the elderly to decide whether to undergo colorectal cancer screening: development and results of an uncontrolled trial
Source: Springer Nature journal article supplement (doi:10.1186/1472-6947-10-54), 2010-09-17
Supplement: 12911_2010_355_MOESM3_ESM.pdf [file 12911_2010_355_MOESM3_ESM.pdf]

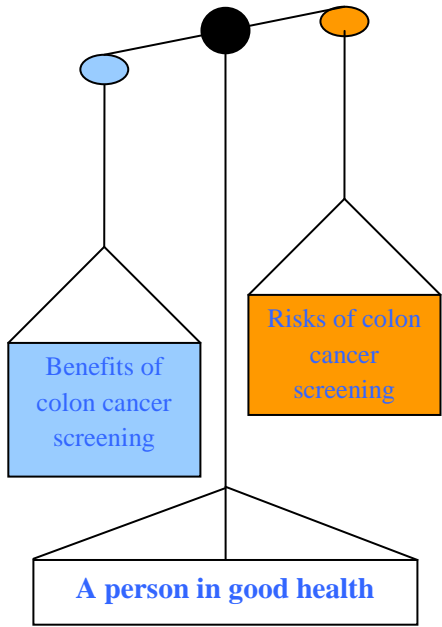

A person in **good health** may be more likely to experience the potential benefits rather than the risks of colon cancer screening. This is because they are more likely to live 5 years or more and benefit from screening if they develop cancer.

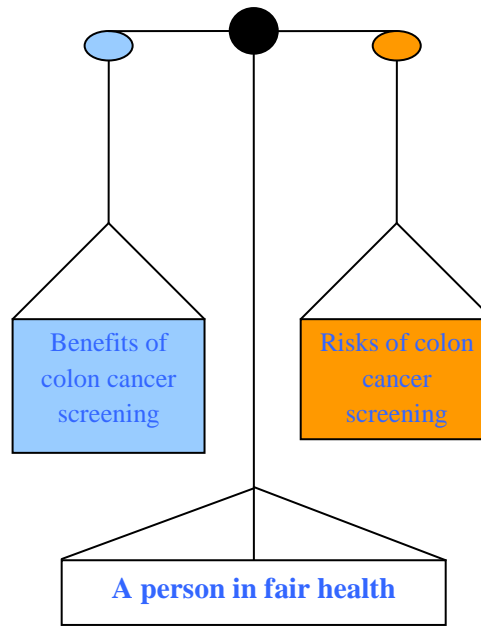

For a person in **fair health** it is difficult to know whether they will live at least 5 years to experience either the benefits or risks of colon cancer screening.

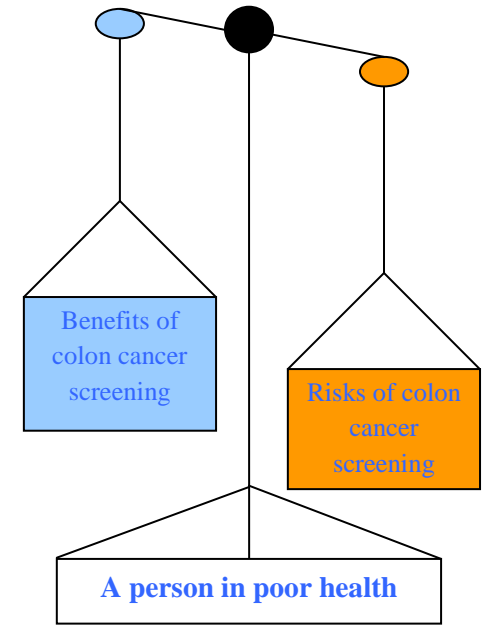

A person in **poor health** may be more likely to experience the potential risks rather than the benefits of colon cancer screening. This is because they are less likely to live 5 years and benefit from screening.
