# Supplementary material for: A targeted decision aid for the elderly to decide whether to undergo colorectal cancer screening: development and results of an uncontrolled trial
Source: Springer Nature journal article supplement (doi:10.1186/1472-6947-10-54), 2010-09-17

**Percent Correct**

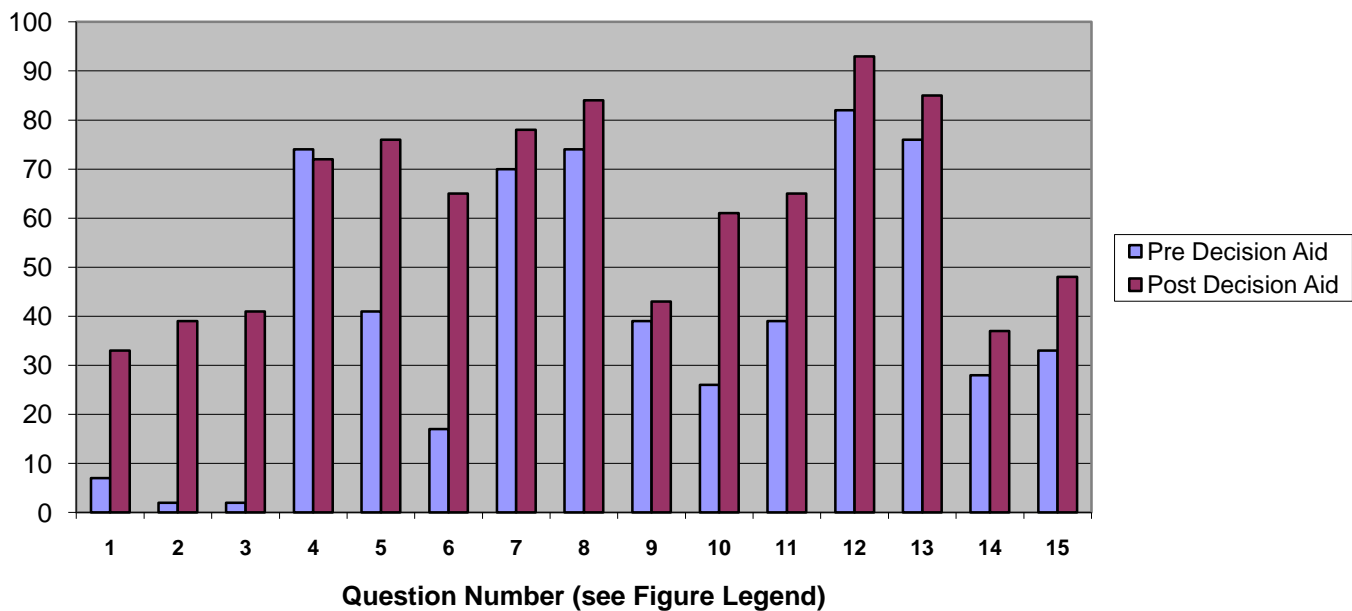

Supplement: 12911_2010_355_MOESM4_ESM.pdf [file 12911_2010_355_MOESM4_ESM.pdf]
